# Supplementary material for: CERAPP: Collaborative Estrogen Receptor Activity Prediction Project
Source: PubMed Central journal article supplement (PMC4937869; doi:10.1289/ehp.1510267), 2016-02-23
Supplement: ehp.1510267.s001.acco.pdf [file ehp.1510267.s001.acco.pdf]

**Note to readers with disabilities:** *EHP* strives to ensure that all journal content is accessible to all readers. However, some figures and Supplemental Material published in *EHP* articles may not conform to [508 standards](#) due to the complexity of the information being presented. If you need assistance accessing journal content, please contact [ehp508@niehs.nih.gov](mailto:ehp508@niehs.nih.gov). Our staff will work with you to assess and meet your accessibility needs within 3 working days.

## **Supplemental Material**

### **CERAPP: Collaborative Estrogen Receptor Activity Prediction Project**

Kamel Mansouri, Ahmed Abdelaziz, Aleksandra Rybacka, Alessandra Roncaglioni, Alexander Tropsha, Alexandre Varnek, Alexey Zakharov, Andrew Worth, Ann M. Richard, Christopher M. Grulke, Daniela Trisciuzzi, Denis Fourches, Dragos Horvath, Emilio Benfenati, Eugene Muratov, Eva Bay Wedeby, Francesca Grisoni, Giuseppe F. Mangiatordi, Giuseppina M. Incisivo, Huixiao Hong, Hui W. Ng, Igor V. Tetko, Ilya Balabin, Jayaram Kancherla, Jie Shen, Julien Burton, Marc Nicklaus, Matteo Cassotti, Nikolai G. Nikolov, Orazio Nicolotti, Patrik L. Andersson, Qingda Zang, Regina Politi, Richard D. Beger, Roberto Todeschini, Ruili Huang, Sherif Farag, Sine A. Rosenberg, Svetoslav Slavov, Xin Hu, and Richard S. Judson

#### **Table of Contents**

**Table S1:** Information on participating groups

**Table S2:** Project plan and tasks accomplished in each step

**Table S3:** Statistics and scores of the categorical models of the different research groups in alphabetic order.

**Table S4:** Sensitivity and specificity of the different evaluation steps for categorical models

**Table S5:** statistics and scores of agonist, antagonist and binding continuous models based on the five potency classes defined using the reference chemicals.

**Table S6:** Participant single categorical models compared to agonist antagonist and binding categorical *consensus* predictions (as the “observed response”) after the 4 correction rules were applied. It shows the number of predicted chemicals (out of the total 32k prediction set), the number of actives (out of the 4001 actives predicted by the consensus categorical model) and summary statistics based on the consensus categorical predictions.

**Figure S1:** Number of chemicals by positive concordance (agreement on actives between the included models) of the categorical binding models on the active compounds of the prediction set (32k). The positive concordance is the fraction of models predicting a certain chemical as active by the total number of models providing a prediction for that chemical.

**Figure S2:** Bar plot of the corrected categorical *consensus* for binding accuracy with variable number of literature sources from the evaluation set. The y-axis, depending on the color of the bar from the legend, represents the balanced accuracy, sensitivity or specificity.

**Table S1:** Information on participating groups

| <b>Abbreviation</b> | <b>Name of the group</b>                                                                | <b>Institution</b>                                                  |
|---------------------|-----------------------------------------------------------------------------------------|---------------------------------------------------------------------|
| DTU                 | National Food Institute/Division of Toxicology and Risk Assessment                      | Technical University of Denmark, Denmark                            |
| EPA_NCCT            | National Center for Computational Toxicology                                            | U.S. Environmental Protection Agency, USA                           |
| FDA_NCTR_DBB        | National Center for Toxicological Research/Division of Bioinformatics and Biostatistics | U.S. Food and Drug Administration, USA                              |
| FDA_NCTR_DSB        | National Center for Toxicological Research/Division of Systems Biology                  | U.S. Food and Drug Administration, USA                              |
| ILS&EPA_NCCT        | ILS Inc & National Center for Computational Toxicology                                  | ILS Inc & U.S. EPA, USA                                             |
| IRCCS               | Environmental Chemistry and Toxicology Laboratory                                       | Istituto di Ricerche Farmacologiche "Mario Negri", Italy            |
| JRC_Ispra           | Institute for Health & Consumer Protection (IHCP)                                       | Joint Research Centre of the European Commission in Ispra, Italy    |
| LockheedMartin&EPA  | High Performance Computing                                                              | Lockheed Martin & U.S. EPA, USA                                     |
| NIH_NCATS           | National Center for Advancing Translational Sciences                                    | National Institutes of Health, USA                                  |
| NIH_NCI             | National Cancer Institute                                                               | National Institutes of Health, USA                                  |
| OCHEM               | Cheminformatics group                                                                   | Institute of Structural Biology Helmholtz Zentrum Muenchen, Germany |
| RIFM                | Computational Toxicology                                                                | Research Institute for Fragrance Materials, Inc, USA                |
| Umeå                | Chemistry Department                                                                    | Umeå University, Sweden                                             |
| UNC_MML             | Laboratory for Molecular Modeling                                                       | University of North Carolina, USA                                   |
| UNIBA               | Department of Pharmacy-Drug Sciences                                                    | University of Bari, Italy                                           |
| UNIMIB              | Milano Chemometrics and QSAR Research Group                                             | University of Milano-Bicocca, Italy                                 |
| UNISTRA             | Laboratoire de Chemoinformatique                                                        | University of Strasbourg, France                                    |

**Table S2:** Project plan and tasks accomplished in each step

| <b>Steps</b>                                                                          | <b>Tasks</b>                                                                                                                                                                                                                                          | <b>Research Groups</b>                                                                                                           |
|---------------------------------------------------------------------------------------|-------------------------------------------------------------------------------------------------------------------------------------------------------------------------------------------------------------------------------------------------------|----------------------------------------------------------------------------------------------------------------------------------|
| <b>Step 1:</b><br>Chemical structure curation                                         | <ul style="list-style-type: none"><li>- Merge chemical structures from different sources</li><li>- Design and document a workflow for structure curation</li><li>- Deliver the QSAR-ready training set and prediction set</li></ul>                   | <ul style="list-style-type: none"><li>-EPA_NCCT</li><li>-UNC_MML</li><li>-DTU</li></ul>                                          |
| <b>Step 2:</b><br>Experimental data preparation from literature for models validation | <ul style="list-style-type: none"><li>- Collect experimental data from literature for the evaluation set</li><li>- Combine the different assays / results into a unique score</li><li>- Define a strategy to evaluate the individual models</li></ul> | <ul style="list-style-type: none"><li>-EPA_NCCT</li><li>-Umeå</li><li>-NIH_NCATS</li><li>-FDA_NCTR_DBB</li><li>- OCHEM</li></ul> |
| <b>Step 3:</b><br>Modeling and predictions                                            | <ul style="list-style-type: none"><li>- Train/refine the models based on the training set</li><li>- Make predictions using the individual models</li><li>- Deliver predictions and applicability domains (AD) for evaluation</li></ul>                | All groups                                                                                                                       |
| <b>Step 4:</b><br>Model evaluation                                                    | <ul style="list-style-type: none"><li>- Analyze the training and evaluation datasets</li><li>- Evaluate the predictions of each model separately</li></ul>                                                                                            | -EPA_NCCT                                                                                                                        |
| <b>Step 5:</b><br><i>Consensus</i> strategy development                               | <ul style="list-style-type: none"><li>- Develop strategies to create <i>consensus</i> scores</li><li>- Define a score for each model based on the evaluation step</li><li>- Define a weighting scheme based on scores</li></ul>                       | - EPA_NCCT<br>(Discussed with all groups)                                                                                        |
| <b>Step 6:</b><br><i>Consensus</i> modeling (and validation)                          | <ul style="list-style-type: none"><li>- Combine the predictions based on the weighting scheme</li><li>- (Validate the <i>consensus</i> model using an experimental evaluation set) if ready?</li></ul>                                                | -EPA_NCCT                                                                                                                        |

**Table S3:** Statistics and scores of the categorical models of the different research groups in alphabetic order.

| <b>Agonist models</b>    | ToxCast data | BA ToxCast | Literature data | BA Literature | Multi. Src. | BA Multi Src | Literature non_vw | BA non_vw | In AD | BA AD | All filters. | BA All filters | % predicted | score_1 | score_2 |
|--------------------------|--------------|------------|-----------------|---------------|-------------|--------------|-------------------|-----------|-------|-------|--------------|----------------|-------------|---------|---------|
| DTU_METI                 | 737          | 0.81       | 2719            | 0.77          | 2662        | 0.81         | 2705              | 0.77      | 2493  | 0.79  | 2432         | 0.85           | 41.41       | 0.38    | 0.83    |
| DTU_TOXCAST              | 1447         | 0.89       | 5343            | 0.79          | 5279        | 0.82         | 5328              | 0.79      | 4679  | 0.81  | 4618         | 0.85           | 84.14       | 0.78    | 0.87    |
| FDA_NCTR_DBB             | 1529         | 0.99       | 6319            | 0.75          | 6251        | 0.78         | 6300              | 0.76      | 6319  | 0.75  | 6232         | 0.79           | 100         | 0.92    | 0.89    |
| LockheedMartin_1         | 1529         | 0.82       | 6319            | 0.69          | 6251        | 0.72         | 6300              | 0.70      | 1684  | 0.80  | 1667         | 0.84           | 100         | 0.78    | 0.83    |
| LockheedMartin_2         | 1529         | 0.76       | 6319            | 0.67          | 6251        | 0.69         | 6300              | 0.68      | 1684  | 0.75  | 1667         | 0.78           | 100         | 0.75    | 0.77    |
| JRC_Ispra                | 1465         | 0.81       | 5995            | 0.77          | 5929        | 0.81         | 5976              | 0.78      | 5995  | 0.77  | 5910         | 0.81           | 94.88       | 0.82    | 0.81    |
| NIH_NCI_GUSAR            | 1529         | 0.99       | 6319            | 0.80          | 6251        | 0.82         | 6300              | 0.81      | 6277  | 0.80  | 6191         | 0.84           | 99.97       | 0.93    | 0.91    |
| NIH_NCI_PASS             | 1465         | 0.87       | 5995            | 0.76          | 5929        | 0.78         | 5976              | 0.77      | 5995  | 0.76  | 5910         | 0.79           | 94.87       | 0.84    | 0.83    |
| OCHEM                    | 1516         | 0.91       | 6200            | 0.80          | 6134        | 0.82         | 6182              | 0.81      | 6200  | 0.80  | 6116         | 0.83           | 97.75       | 0.89    | 0.87    |
| UNIBA                    | 755          | 0.85       | 2899            | 0.82          | 2875        | 0.83         | 2888              | 0.82      | 2899  | 0.82  | 2864         | 0.84           | 47.51       | 0.42    | 0.84    |
| UNISTRA                  | 1529         | 0.85       | 6319            | 0.73          | 6251        | 0.76         | 6300              | 0.74      | 5366  | 0.69  | 5298         | 0.73           | 100         | 0.85    | 0.79    |
| <b>Antagonist models</b> |              |            |                 |               |             |              |                   |           |       |       |              |                |             |         |         |
| FDA_NCTR_DBB             | 1529         | 0.99       | 6539            | 0.55          | 6538        | 0.55         | 6463              | 0.56      | 6539  | 0.55  | 6462         | 0.56           | 100         | 0.85    | 0.78    |
| LockheedMartin_1         | 1529         | 0.89       | 6539            | 0.52          | 6538        | 0.52         | 6463              | 0.52      | 6539  | 0.52  | 6462         | 0.52           | 100         | 0.80    | 0.70    |
| LockheedMartin_2         | 1529         | 0.72       | 6539            | 0.51          | 6538        | 0.51         | 6463              | 0.51      | 6539  | 0.51  | 6462         | 0.51           | 100         | 0.74    | 0.62    |
| JRC_Ispra                | 1465         | 0.75       | 6186            | 0.55          | 6185        | 0.55         | 6115              | 0.57      | 6186  | 0.55  | 6114         | 0.56           | 94.88       | 0.73    | 0.66    |
| NIH_NCI_GUSAR            | 1529         | 1.00       | 6539            | 0.54          | 6538        | 0.54         | 6463              | 0.55      | 6509  | 0.54  | 6433         | 0.55           | 99.97       | 0.85    | 0.77    |
| NIH_NCI_PASS             | 1465         | 0.79       | 6186            | 0.49          | 6185        | 0.49         | 6115              | 0.49      | 6186  | 0.49  | 6114         | 0.49           | 94.87       | 0.72    | 0.64    |
| OCHEM                    | 1516         | 0.72       | 6431            | 0.63          | 6430        | 0.63         | 6356              | 0.65      | 6431  | 0.63  | 6355         | 0.65           | 97.75       | 0.77    | 0.69    |
| UNIBA                    | 434          | 0.92       | 1723            | 0.63          | 1722        | 0.63         | 1706              | 0.65      | 1723  | 0.63  | 1705         | 0.65           | 25.98       | 0.23    | 0.78    |

| <b>Binding models</b> |      |      |      |      |      |      |      |      |      |      |      |      |       |      |      |
|-----------------------|------|------|------|------|------|------|------|------|------|------|------|------|-------|------|------|
| DTU_METI              | 873  | 0.82 | 3840 | 0.64 | 3243 | 0.71 | 3482 | 0.68 | 3306 | 0.66 | 2695 | 0.78 | 49.48 | 0.43 | 0.80 |
| EPA_NCCT              | 1529 | 0.87 | 7283 | 0.57 | 6217 | 0.63 | 6598 | 0.60 | 6383 | 0.58 | 5275 | 0.69 | 100   | 0.82 | 0.78 |
| FDA_NCTR_DBB          | 1529 | 0.99 | 7283 | 0.60 | 6217 | 0.66 | 6598 | 0.63 | 7283 | 0.60 | 5991 | 0.68 | 100   | 0.87 | 0.84 |
| FDA_NCTR_DSB          | 1019 | 0.80 | 534  | 0.62 | 450  | 0.65 | 492  | 0.64 | 534  | 0.62 | 431  | 0.66 | 0.62  | -    | 0.69 |
| ILS_EPA               | 1506 | 0.84 | 7068 | 0.66 | 6031 | 0.73 | 6404 | 0.69 | 7068 | 0.66 | 5814 | 0.75 | 96.47 | 0.82 | 0.79 |
| IRCCS_CART            | 1529 | 0.80 | 7280 | 0.61 | 6214 | 0.67 | 6595 | 0.63 | 4326 | 0.62 | 3620 | 0.75 | 99.99 | 0.78 | 0.77 |
| IRCCS_Ruleset         | 1383 | 0.91 | 6603 | 0.56 | 5621 | 0.61 | 5978 | 0.58 | 6603 | 0.56 | 5416 | 0.62 | 89.20 | 0.75 | 0.77 |
| JRC_Ispra             | 1465 | 0.82 | 6900 | 0.58 | 5885 | 0.64 | 6250 | 0.62 | 6900 | 0.58 | 5672 | 0.67 | 94.88 | 0.77 | 0.74 |
| LockheedMartin_1      | 1529 | 0.83 | 7283 | 0.55 | 6217 | 0.59 | 6598 | 0.57 | 1977 | 0.56 | 1539 | 0.66 | 100   | 0.75 | 0.75 |
| LockheedMartin_2      | 1529 | 0.76 | 7283 | 0.54 | 6217 | 0.58 | 6598 | 0.56 | 1977 | 0.56 | 1539 | 0.64 | 100   | 0.72 | 0.70 |
| NIH_NCATS             | 1528 | 0.69 | 7271 | 0.59 | 6207 | 0.63 | 6587 | 0.61 | 7271 | 0.59 | 5981 | 0.65 | 99.13 | 0.77 | 0.67 |
| NIH_NCI_GUSAR         | 1529 | 0.99 | 7283 | 0.61 | 6217 | 0.66 | 6598 | 0.64 | 7235 | 0.61 | 5951 | 0.69 | 99.97 | 0.88 | 0.84 |
| NIH_NCI_PASS          | 1465 | 0.86 | 6900 | 0.58 | 5885 | 0.63 | 6250 | 0.61 | 6900 | 0.58 | 5672 | 0.66 | 94.87 | 0.78 | 0.76 |
| OCHEM                 | 1512 | 0.89 | 7123 | 0.62 | 6081 | 0.69 | 6455 | 0.65 | 7123 | 0.62 | 5860 | 0.72 | 97.43 | 0.83 | 0.80 |
| RIFM                  | 1529 | 0.73 | 7283 | 0.58 | 6217 | 0.64 | 6598 | 0.59 | 7283 | 0.58 | 5991 | 0.65 | 100   | 0.78 | 0.69 |
| Umeå                  | 1529 | 0.82 | 7280 | 0.61 | 6215 | 0.68 | 6596 | 0.64 | 7280 | 0.61 | 5989 | 0.70 | 99.89 | 0.82 | 0.76 |
| UNC_MML               | 1529 | 0.80 | 7283 | 0.59 | 6217 | 0.63 | 6598 | 0.61 | 7283 | 0.59 | 5991 | 0.65 | 100   | 0.80 | 0.73 |
| UNIBA                 | 750  | 0.86 | 3259 | 0.62 | 2853 | 0.69 | 2963 | 0.67 | 3259 | 0.62 | 2753 | 0.73 | 46.75 | 0.40 | 0.80 |
| UNIMIB_1              | 1529 | 0.76 | 7283 | 0.55 | 6217 | 0.57 | 6598 | 0.56 | 7283 | 0.55 | 5991 | 0.59 | 100   | 0.77 | 0.68 |
| UNIMIB_2              | 531  | 0.98 | 2780 | 0.62 | 2348 | 0.69 | 2475 | 0.65 | 2780 | 0.62 | 2241 | 0.71 | 36.44 | 0.32 | 0.85 |
| UNISTRA               | 1529 | 0.86 | 7283 | 0.57 | 6217 | 0.62 | 6598 | 0.60 | 5800 | 0.54 | 4755 | 0.60 | 100   | 0.80 | 0.73 |

The number of chemicals used for the evaluation of each model for the different steps is also provided. ToxCast data: predictions overlapping with the 1529 ToxCast chemicals. BA: balanced accuracy; Multi. Src: number of compounds in the literature data with multiple literature sources; non\_vw: number of compounds in the literature data that are not very weak binders; In AD: number of compounds inside the applicability domain; All filters: remaining compounds after removing the chemicals with single source, very weak and outside the AD, % predicted: the fraction of the predicted chemicals by a certain model out of the total 32k list, score\_1 and score\_2 are scoring functions calculated using equations 1 and 2, respectively.

**Table S4:** Sensitivity and specificity of the different evaluation steps for categorical models

| <b>agonist models</b>    | SN ToxCast | SP ToxCast | SN All literature | SP All literature | SN multSrc Literature | multSrc SP Literature | SN no_VW literature | SP no_VW literature | SN in_AD Literature | SP in_AD Literature | SN allPar Literature | SP allPar Literature |
|--------------------------|------------|------------|-------------------|-------------------|-----------------------|-----------------------|---------------------|---------------------|---------------------|---------------------|----------------------|----------------------|
| DTU_METI                 | 0.689      | 0.922      | 0.624             | 0.918             | 0.705                 | 0.919                 | 0.630               | 0.918               | 0.644               | 0.943               | 0.751                | 0.944                |
| DTU_TOXCAS T             | 0.875      | 0.904      | 0.673             | 0.898             | 0.738                 | 0.898                 | 0.689               | 0.898               | 0.678               | 0.932               | 0.764                | 0.932                |
| FDA_NCTR_D BB            | 1.000      | 0.986      | 0.560             | 0.949             | 0.619                 | 0.950                 | 0.565               | 0.949               | 0.560               | 0.949               | 0.629                | 0.950                |
| JRC_Ispra                | 0.725      | 0.890      | 0.640             | 0.910             | 0.706                 | 0.911                 | 0.646               | 0.910               | 0.640               | 0.910               | 0.719                | 0.911                |
| LockheedMartin_1         | 0.650      | 0.999      | 0.400             | 0.990             | 0.455                 | 0.990                 | 0.417               | 0.990               | 0.604               | 0.997               | 0.681                | 0.998                |
| LockheedMartin_2         | 0.525      | 0.990      | 0.357             | 0.985             | 0.402                 | 0.985                 | 0.375               | 0.985               | 0.509               | 0.992               | 0.571                | 0.992                |
| NIH_NCI_GUS AR           | 1.000      | 0.981      | 0.737             | 0.865             | 0.783                 | 0.865                 | 0.752               | 0.865               | 0.741               | 0.865               | 0.808                | 0.865                |
| NIH_NCI_PASS             | 0.988      | 0.747      | 0.767             | 0.758             | 0.801                 | 0.759                 | 0.778               | 0.758               | 0.767               | 0.758               | 0.817                | 0.759                |
| OCHEM                    | 0.949      | 0.866      | 0.748             | 0.857             | 0.792                 | 0.858                 | 0.755               | 0.857               | 0.748               | 0.857               | 0.804                | 0.858                |
| UNIBA                    | 0.755      | 0.936      | 0.760             | 0.873             | 0.792                 | 0.873                 | 0.774               | 0.873               | 0.760               | 0.873               | 0.811                | 0.873                |
| UNISTRA                  | 0.725      | 0.977      | 0.503             | 0.963             | 0.566                 | 0.963                 | 0.514               | 0.963               | 0.415               | 0.962               | 0.492                | 0.962                |
| <b>antagonist models</b> |            |            |                   |                   |                       |                       |                     |                     |                     |                     |                      |                      |
| FDA_NCTR_D BB            | 1.000      | 0.978      | 0.113             | 0.984             | 0.110                 | 0.984                 | 0.144               | 0.984               | 0.113               | 0.984               | 0.140                | 0.984                |
| JRC_Ispra                | 0.667      | 0.827      | 0.263             | 0.842             | 0.260                 | 0.842                 | 0.290               | 0.842               | 0.263               | 0.842               | 0.286                | 0.842                |
| LockheedMartin_1         | 0.778      | 1.000      | 0.039             | 0.997             | 0.035                 | 0.997                 | 0.048               | 0.997               | 0.039               | 0.997               | 0.043                | 0.997                |
| LockheedMartin_2         | 0.444      | 0.997      | 0.028             | 0.996             | 0.025                 | 0.996                 | 0.034               | 0.996               | 0.028               | 0.996               | 0.029                | 0.996                |
| NIH_NCI_GUS AR           | 1.000      | 0.992      | 0.204             | 0.878             | 0.201                 | 0.878                 | 0.221               | 0.878               | 0.196               | 0.880               | 0.211                | 0.880                |
| NIH_NCI_PASS             | 1.000      | 0.586      | 0.393             | 0.591             | 0.390                 | 0.591                 | 0.398               | 0.591               | 0.393               | 0.591               | 0.394                | 0.591                |
| OCHEM                    | 0.667      | 0.774      | 0.479             | 0.782             | 0.477                 | 0.782                 | 0.522               | 0.782               | 0.479               | 0.782               | 0.519                | 0.782                |
| UNIBA                    | 1.000      | 0.837      | 0.442             | 0.819             | 0.434                 | 0.819                 | 0.483               | 0.819               | 0.442               | 0.819               | 0.475                | 0.819                |

| <b>binding models</b> |       |       |       |       |       |       |       |       |       |       |       |       |
|-----------------------|-------|-------|-------|-------|-------|-------|-------|-------|-------|-------|-------|-------|
| DTU_METI              | 0.805 | 0.828 | 0.428 | 0.848 | 0.579 | 0.849 | 0.503 | 0.848 | 0.421 | 0.890 | 0.665 | 0.891 |
| EPA_NCCT              | 0.865 | 0.877 | 0.297 | 0.848 | 0.418 | 0.851 | 0.352 | 0.848 | 0.309 | 0.860 | 0.517 | 0.863 |
| FDA_NCTR_D<br>BB      | 1.000 | 0.977 | 0.262 | 0.935 | 0.374 | 0.938 | 0.318 | 0.935 | 0.262 | 0.935 | 0.425 | 0.938 |
| FDA_NCTR_DS<br>B      | 0.820 | 0.780 | 0.706 | 0.528 | 0.776 | 0.521 | 0.758 | 0.528 | 0.706 | 0.528 | 0.801 | 0.521 |
| ILS_EPA               | 0.943 | 0.863 | 0.525 | 0.842 | 0.665 | 0.846 | 0.585 | 0.842 | 0.525 | 0.842 | 0.696 | 0.795 |
| IRCCS_CART            | 0.708 | 0.738 | 0.314 | 0.793 | 0.437 | 0.795 | 0.371 | 0.793 | 0.302 | 0.793 | 0.557 | 0.939 |
| IRCCS_Ruleset         | 0.940 | 0.883 | 0.253 | 0.898 | 0.344 | 0.899 | 0.292 | 0.898 | 0.253 | 0.938 | 0.383 | 0.866 |
| JRC_Ispra             | 0.843 | 0.883 | 0.370 | 0.863 | 0.485 | 0.866 | 0.439 | 0.863 | 0.370 | 0.863 | 0.536 | 0.804 |
| LockheedMart<br>in_1  | 0.663 | 0.795 | 0.109 | 0.800 | 0.189 | 0.804 | 0.153 | 0.800 | 0.132 | 0.800 | 0.326 | 0.997 |
| LockheedMart<br>in_2  | 0.539 | 1.000 | 0.109 | 0.985 | 0.180 | 0.985 | 0.149 | 0.985 | 0.126 | 0.995 | 0.295 | 0.988 |
| NIH_NCATS             | 0.517 | 0.990 | 0.326 | 0.979 | 0.410 | 0.979 | 0.366 | 0.979 | 0.326 | 0.987 | 0.451 | 0.854 |
| NIH_NCI_GUS<br>AR     | 1.000 | 0.866 | 0.381 | 0.853 | 0.483 | 0.854 | 0.439 | 0.853 | 0.382 | 0.853 | 0.546 | 0.837 |
| NIH_NCI_PASS          | 0.978 | 0.983 | 0.418 | 0.835 | 0.518 | 0.838 | 0.472 | 0.835 | 0.418 | 0.834 | 0.565 | 0.747 |
| OCHEM                 | 0.920 | 0.741 | 0.405 | 0.741 | 0.538 | 0.747 | 0.467 | 0.741 | 0.405 | 0.741 | 0.587 | 0.846 |
| RIFM                  | 0.719 | 0.744 | 0.368 | 0.797 | 0.478 | 0.799 | 0.392 | 0.797 | 0.368 | 0.797 | 0.498 | 0.799 |
| Umeå                  | 0.730 | 0.911 | 0.312 | 0.904 | 0.449 | 0.904 | 0.370 | 0.904 | 0.312 | 0.904 | 0.500 | 0.904 |
| UNC_MML               | 0.775 | 0.818 | 0.383 | 0.792 | 0.469 | 0.792 | 0.427 | 0.792 | 0.383 | 0.792 | 0.517 | 0.792 |
| UNIBA                 | 0.774 | 0.948 | 0.335 | 0.900 | 0.487 | 0.900 | 0.442 | 0.900 | 0.335 | 0.900 | 0.563 | 0.900 |
| UNIMIB_1              | 0.865 | 0.658 | 0.365 | 0.726 | 0.417 | 0.730 | 0.400 | 0.726 | 0.365 | 0.726 | 0.449 | 0.730 |
| UNIMIB_2              | 1.000 | 0.969 | 0.483 | 0.759 | 0.609 | 0.765 | 0.533 | 0.759 | 0.483 | 0.759 | 0.658 | 0.765 |
| UNISTRA               | 0.730 | 0.981 | 0.182 | 0.955 | 0.286 | 0.957 | 0.236 | 0.955 | 0.109 | 0.969 | 0.222 | 0.972 |

SN: sensitivity; SP: specificity. Multsrc: number of compounds in the literature data with multiple literature sources; no\_VW: not very weak binders in the literature data; in\_AD: compounds inside the AD; AllPar: remaining compounds after removing the chemicals with single source, very weak and outside the AD



**Table S5:** statistics and scores of agonist, antagonist and binding continuous models based on the five potency classes defined using the reference chemicals.

| <b>Agonist models</b>    | ToxCast_data | BA ToxCast | Literature data | BA literature | Multi. Src | BA Multi Src | Literature non_vw | BA non_vw | All filters | BA All filters | predicted % | score | weights |
|--------------------------|--------------|------------|-----------------|---------------|------------|--------------|-------------------|-----------|-------------|----------------|-------------|-------|---------|
| LockheedMartin_1         | 1529         | 0.771      | 6163            | 0.504         | 6163       | 0.504        | 6144              | 0.500     | 6144        | 0.500          | 100         | 0.721 | 0.370   |
| LockheedMartin_2         | 1529         | 0.686      | 6163            | 0.515         | 6163       | 0.515        | 6144              | 0.503     | 6144        | 0.503          | 100         | 0.577 | 0.295   |
| UNISTRA                  | 1529         | 0.703      | 6163            | 0.507         | 6163       | 0.507        | 6144              | 0.501     | 6144        | 0.501          | 100         | 0.654 | 0.335   |
| <b>Antagonist models</b> |              |            |                 |               |            |              |                   |           |             |                |             |       |         |
| LockheedMartin_1         | 1529         | 0.930      | 6505            | 0.500         | 6504       | 0.500        | 6429              | 0.501     | 6428        | 0.501          | 100         | 0.786 | 0.661   |
| LockheedMartin_2         | 1529         | 0.544      | 6505            | 0.499         | 6504       | 0.499        | 6429              | 0.500     | 6428        | 0.500          | 100         | 0.403 | 0.339   |
| <b>Binding models</b>    |              |            |                 |               |            |              |                   |           |             |                |             |       |         |
| LockheedMartin_1         | 1529         | 0.798      | 6770            | 0.504         | 5887       | 0.502        | 6085              | 0.502     | 5681        | 0.982          | 100         | 0.733 | 0.373   |
| LockheedMartin_2         | 1529         | 0.673      | 6770            | 0.502         | 5887       | 0.500        | 6085              | 0.501     | 5681        | 0.979          | 100         | 0.581 | 0.296   |
| UNISTRA                  | 1529         | 0.688      | 6770            | 0.499         | 5887       | 0.498        | 6085              | 0.500     | 5681        | 0.980          | 100         | 0.649 | 0.331   |

The number of chemicals used for the evaluation of each model for the different steps is also provided. ToxCast data: predictions overlapping with the 1529 ToxCast chemicals. BA: balanced accuracy; Multi. Src: number of compounds in the literature data with multiple literature sources; non\_vw: number of compounds in the literature data that are not very weak binders; All filters: remaining compounds after removing the chemicals with single source, very weak and outside the AD, % predicted: the fraction of the predicted chemicals by a certain model out of the total 32k list, score is a scoring function calculated using equation 2

**Table S6:** Participant single categorical models compared to agonist antagonist and binding categorical *consensus* predictions (as the “observed response”) after the 4 correction rules were applied. It shows the number of predicted chemicals (out of the total 32k prediction set), the number of actives (out of the 4001 actives predicted by the consensus categorical model) and summary statistics based on the consensus categorical predictions.

| <b>Agonist models</b>    | Predicted | Actives | Sensitivity | Specificity | Balanced accuracy |
|--------------------------|-----------|---------|-------------|-------------|-------------------|
| DTU_METI                 | 13442     | 1575    | 0.47        | 0.95        | 0.71              |
| DTU_TOXCAST              | 27316     | 3515    | 0.80        | 0.93        | 0.87              |
| FDA_NCTR_DBB             | 32464     | 2506    | 0.57        | 0.96        | 0.77              |
| JRC_Ispra                | 30801     | 3549    | 0.72        | 0.94        | 0.83              |
| LockheedMartin_1         | 32464     | 719     | 0.26        | ~1          | 0.63              |
| LockheedMartin_2         | 32464     | 829     | 0.30        | ~1          | 0.65              |
| NIH_NCI_GUSAR            | 32455     | 6410    | 0.90        | 0.86        | 0.88              |
| NIH_NCI_PASS             | 30800     | 9051    | 0.94        | 0.76        | 0.85              |
| OCHEM                    | 31736     | 5867    | 0.94        | 0.88        | 0.91              |
| UNIBA                    | 15426     | 1906    | 0.72        | 0.91        | 0.81              |
| UNISTRA                  | 32464     | 1855    | 0.52        | 0.98        | 0.75              |
| <b>Antagonist models</b> |           |         |             |             |                   |
| FDA_NCTR_DBB             | 32464     | 691     | 0.08        | 0.98        | 0.53              |
| JRC_Ispra                | 30801     | 4967    | 0.71        | 0.89        | 0.80              |
| LockheedMartin_1         | 32464     | 101     | 0.01        | ~1          | ~0.5              |
| LockheedMartin_2         | 32464     | 117     | ~0          | ~1          | ~0.5              |
| NIH_NCI_GUSAR            | 32455     | 4906    | 0.30        | 0.86        | 0.58              |
| NIH_NCI_PASS             | 30800     | 13197   | 0.74        | 0.60        | 0.67              |
| OCHEM                    | 31736     | 8586    | 0.56        | 0.76        | 0.66              |
| UNIBA                    | 8433      | 1519    | 0.81        | 0.88        | 0.85              |
| <b>Binding models</b>    |           |         |             |             |                   |
| DTU_METI                 | 16063     | 3952    | 0.55        | 0.83        | 0.69              |
| EPA_NCCT                 | 32463     | 5360    | 0.66        | 0.90        | 0.78              |
| FDA_NCTR_DBB             | 32464     | 3070    | 0.56        | 0.97        | 0.77              |
| FDA_NCTR_DSB             | 2008      | 1073    | 0.59        | 0.61        | 0.60              |
| ILS_EPA                  | 31318     | 8335    | 0.64        | 0.79        | 0.71              |
| IRCCS_CART               | 32442     | 5170    | 0.48        | 0.88        | 0.68              |
| IRCCS_Ruleset            | 28958     | 4387    | 0.51        | 0.9         | 0.71              |
| JRC_Ispra                | 30801     | 7236    | 0.77        | 0.84        | 0.81              |
| LockheedMartin_1         | 32464     | 815     | 0.19        | ~1          | 0.60              |
| LockheedMartin_2         | 32464     | 944     | 0.22        | ~1          | 0.61              |
| NIH_NCATS                | 32184     | 6006    | 0.51        | 0.86        | 0.68              |
| NIH_NCI_GUSAR            | 32455     | 7563    | 0.88        | 0.86        | 0.87              |
| NIH_NCI_PASS             | 30800     | 9343    | 0.86        | 0.78        | 0.82              |
| OCHEM                    | 31629     | 6429    | 0.91        | 0.90        | 0.91              |
| RIFM                     | 32463     | 8690    | 0.54        | 0.77        | 0.66              |
| Umeå                     | 32430     | 4405    | 0.38        | 0.90        | 0.64              |
| UNC_MML                  | 32464     | 7179    | 0.5         | 0.82        | 0.66              |
| UNIBA                    | 15178     | 1658    | 0.59        | 0.94        | 0.76              |
| UNIMIB_1                 | 32464     | 9922    | 0.68        | 0.75        | 0.71              |
| UNIMIB_2                 | 11832     | 3586    | 0.90        | 0.81        | 0.85              |
| UNISTRA                  | 32464     | 2003    | 0.39        | 0.98        | 0.68              |

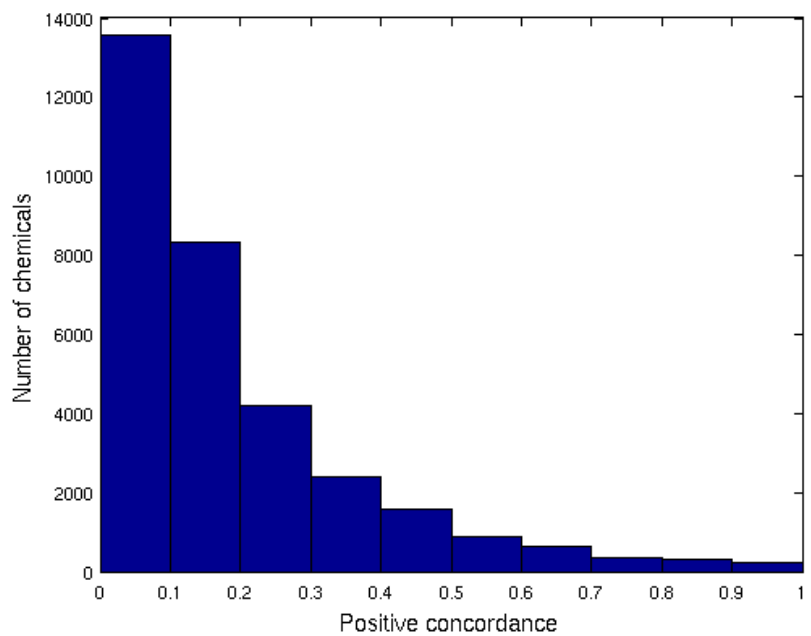

**Figure S1:** Number of chemicals by positive concordance (agreement on actives between the included models) of the categorical binding models on the active compounds of the prediction set (32k). The positive concordance is the fraction of models predicting a certain chemical as active by the total number of models providing a prediction for that chemical.

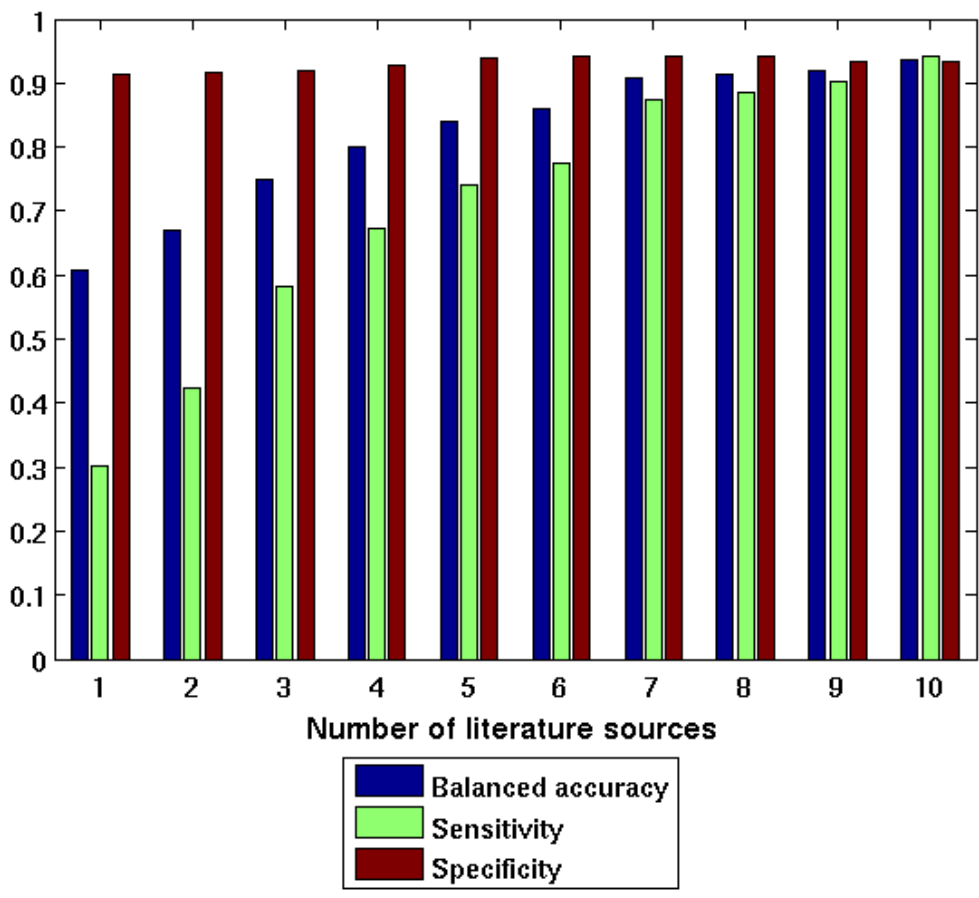

**Figure S2:** Bar plot of the corrected categorical *consensus* for binding accuracy with variable number of literature sources from the evaluation set. The y-axis, depending on the color of the bar from the legend, represents the balanced accuracy, sensitivity or specificity.
